# Supplementary material for: Super-long continuous Ni nanowires encapsulated in carbon nanotubesElectronic supplementary information (ESI) available: SEM images. See http://www.rsc.org/suppdata/cc/b4/b405444j/
Source: Royal Society of Chemistry journal article supplement (doi:10.1039/b405444j), 2004-01-01
Supplement: b405444j.pdf [file b405444j.pdf]

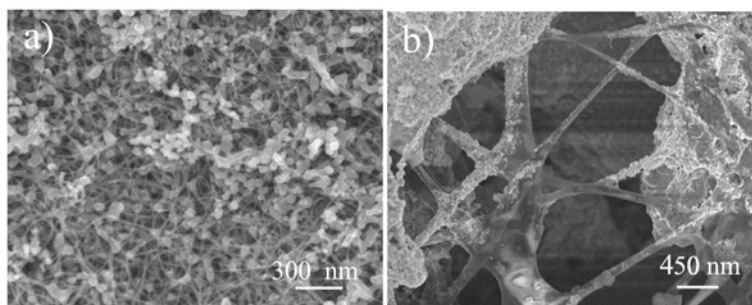

Fig. a) SEM image of the cloth-like raw soot;  
b) Typical SEM image of the brushy materials after CVD

Fig a shows a high magnification SEM image of cloth-like SWNTs. The SWNT bundles, together with a large number of catalyst particles, could be clearly seen in the products. The purity (volume) is estimated to be 30%. After CVD process, there were some brushy materials on the smooth surface of the cloth-like raw soot. Fig b shows the typical SEM image of the brushy materials after CVD. The figure clearly shows that the brushy materials contain wire-like nanomaterials, which is quite different from the original cloth-like raw soot.
